# Supplementary material for: Leucine-rich repeat receptor-like gene screen reveals that Nicotiana RXEG1 regulates glycoside hydrolase 12 MAMP detection
Source: PubMed Central journal article supplement (PMC5807360; doi:10.1038/s41467-018-03010-8), 2018-02-09
Supplement: 41467_2018_3010_MOESM1_ESM.pdf [file 41467_2018_3010_MOESM1_ESM.pdf]

## **Supplementary Information**

**Leucine-rich repeat receptor-like gene screen  
reveals that *Nicotiana* RXEG1 regulates  
glycoside hydrolase 12 MAMP detection**

Wang et al.

**Supplementary Figure 1. Phylogenetic analysis of LRR-RLKs in *Nicotiana benthamiana*.** LRR-RLKs in *Arabidopsis thaliana*, which represent the 20 subgroups<sup>1,2</sup>, were used as references. Different colors indicate different subgroups. Phylogenetic maximum-likelihood (ML) tree was constructed using the predicted kinase domain sequences and PhyML implemented in SEAVIEW software (<http://doua.prabi.fr/software/seaview>). The phylogenetic trees were displayed using iTOL (<http://itol.embl.de>).

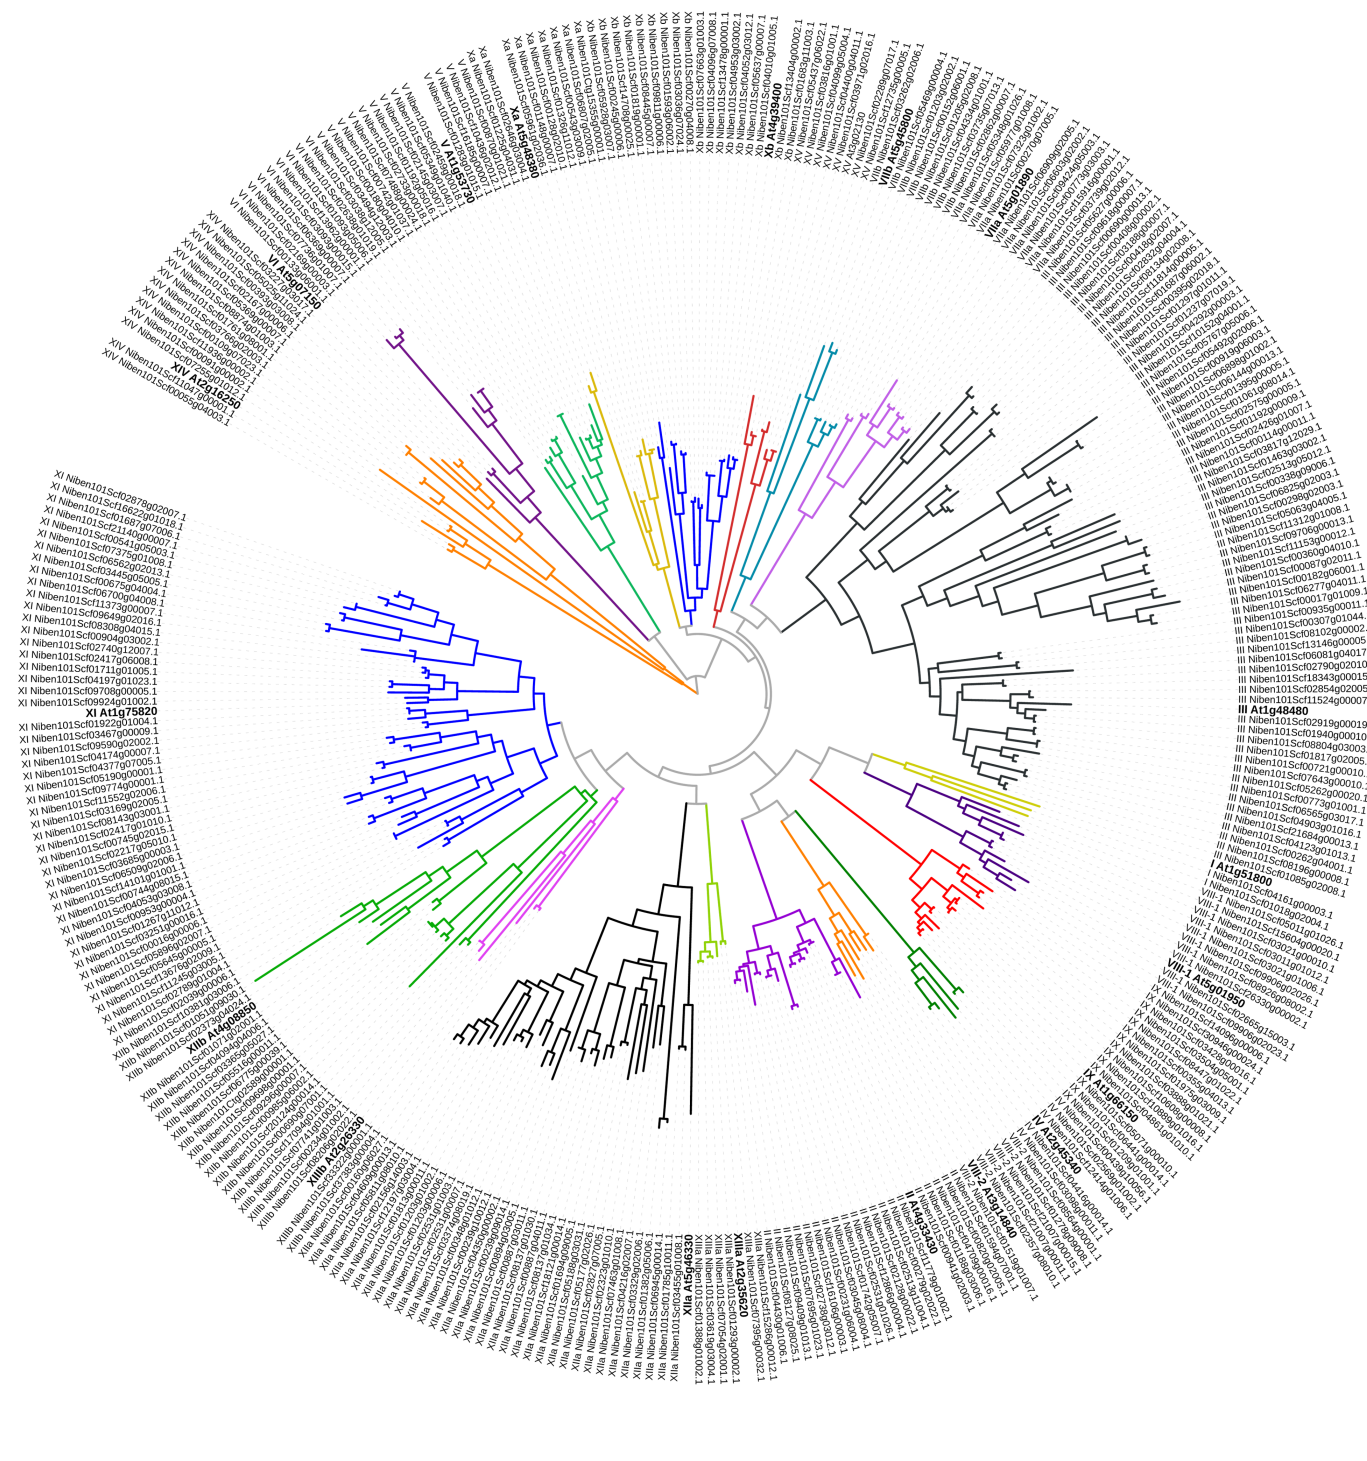

a

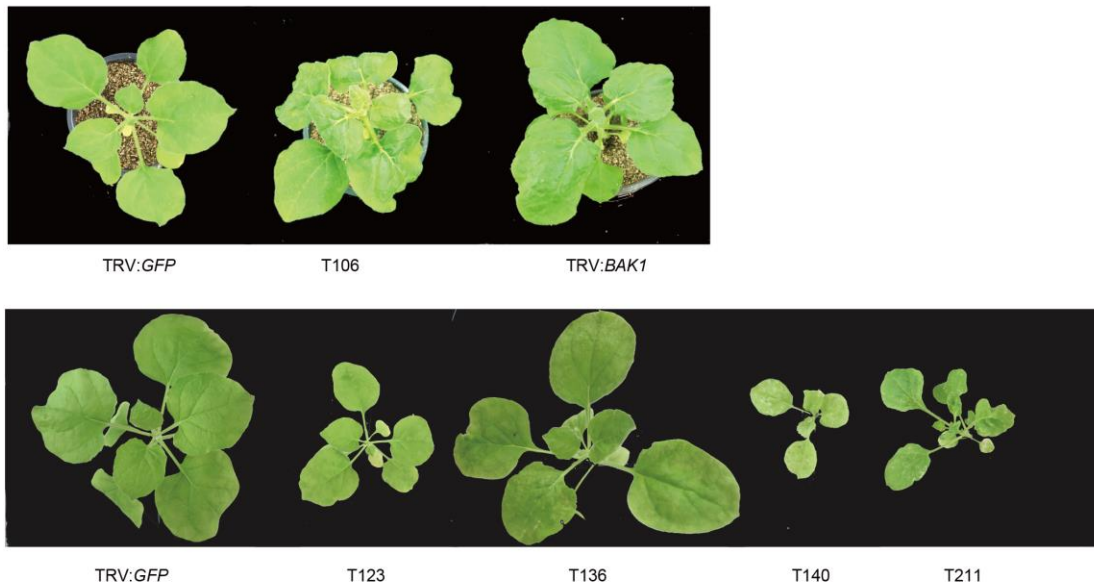

b

| Construct | Type       | Targets                  | No. of LRRs | Sequence Similarity    |                     |                  |               |                    |
|-----------|------------|--------------------------|-------------|------------------------|---------------------|------------------|---------------|--------------------|
|           |            |                          |             | <i>S. lycopersicum</i> | <i>S. tuberosum</i> | <i>C. annuum</i> | <i>G. max</i> | <i>A. thaliana</i> |
| T106      | RD-LRR-RLK | Niben101Scf01683g11003.1 | 21          | 88.58                  | 88.82               | 88.23            | 69.86         | 66.69              |
|           | RD-LRR-RLK | Niben101Scf13404g00002.1 | 22          | 88.58                  | 88.73               | 88.31            | 69.96         | 66.61              |
| T123      | GH-LRR-RLK | Niben101Scf11153g00012.1 | 5           | 77.96                  | 78.85               | 76.61            | 48.3          | 50.23              |
|           | LRR-RLP    | Niben101Scf02298g01015.1 | 5           | 76.1                   | 44.5                | 63.4             | 49.5          | 30.8               |
| T136      | RD-LRR-RLK | Niben101Scf10608g00008.1 | 9           | 78.06                  | 87.91               | 86.38            | 65.73         | 61.41              |
|           | RD-LRR-RLK | Niben101Scf03888g01021.1 | 9           | 78.05                  | 87.15               | 85.27            | 65.13         | 60.71              |
| T140      | GN-LRR-RLK | Niben101Scf04292g00003.1 | 9           | 77.6                   | 77.59               | 68.02            | 67.2          | 61.6               |
|           | GN-LRR-RLK | Niben101Scf10152g04001.1 | 9           | 77.85                  | 79.59               | 68.53            | 67.88         | 62.81              |
| T211      | GN-LRR-RLK | Niben101Scf06204g00001.1 | 3           | 73.68                  | 75.53               | 76.4             | 46.55         | 32.18              |
|           | LRR-RLP    | Niben101Scf00683g02006.1 | 4           | 71.8                   | 12.6                | 79.2             | 43.2          | 23.5               |

**Supplementary Figure 2. Several conserved LRR-RLKs play a potential role in plant development.**

**a**, Morphology of TRV construct-treated *N. benthamiana* plants. Plants were photographed five weeks after silencing.

**b**, Conservation of LRR receptor-like genes with a potential role in plant development among different plant species. The number indicates the similarity with their orthologs in indicated plant species.

|                                                                                                                                                                                                                                                                                                                                                                                                                                                                                                                                                                                                                                                                                                                                                                                                                                                                                                                                                                                                                                                                                                                                                                                                                                                                                                                                                                                                                                                                                                                            |                                                                                                                                                                                                                                                                                                                                                                                                                                                                                                                                                                                                                                                                                                                                                                                                                                                                                                                                                                                                                                                                                                                                                                                                                                                                                                                                                                                                                                                                                                                                 |                                                                                                                                                                                                                                                                                                                                                                                                                                                                                                                                                                                                                                                                                                                                                                                                                                                                              |
|----------------------------------------------------------------------------------------------------------------------------------------------------------------------------------------------------------------------------------------------------------------------------------------------------------------------------------------------------------------------------------------------------------------------------------------------------------------------------------------------------------------------------------------------------------------------------------------------------------------------------------------------------------------------------------------------------------------------------------------------------------------------------------------------------------------------------------------------------------------------------------------------------------------------------------------------------------------------------------------------------------------------------------------------------------------------------------------------------------------------------------------------------------------------------------------------------------------------------------------------------------------------------------------------------------------------------------------------------------------------------------------------------------------------------------------------------------------------------------------------------------------------------|---------------------------------------------------------------------------------------------------------------------------------------------------------------------------------------------------------------------------------------------------------------------------------------------------------------------------------------------------------------------------------------------------------------------------------------------------------------------------------------------------------------------------------------------------------------------------------------------------------------------------------------------------------------------------------------------------------------------------------------------------------------------------------------------------------------------------------------------------------------------------------------------------------------------------------------------------------------------------------------------------------------------------------------------------------------------------------------------------------------------------------------------------------------------------------------------------------------------------------------------------------------------------------------------------------------------------------------------------------------------------------------------------------------------------------------------------------------------------------------------------------------------------------|------------------------------------------------------------------------------------------------------------------------------------------------------------------------------------------------------------------------------------------------------------------------------------------------------------------------------------------------------------------------------------------------------------------------------------------------------------------------------------------------------------------------------------------------------------------------------------------------------------------------------------------------------------------------------------------------------------------------------------------------------------------------------------------------------------------------------------------------------------------------------|
| <p><b>RXEG1</b></p> <p>SP MGKREYFSSAHFLVTLSSLLLQAAFQ</p> <p>NT LTLCTEKERDALLEFRRLSD</p> <p>NT NFGQLSTWGDDEEDKKECKKRWGIECNKTTGH</p> <p>NT VIVLIDLHNAFTCSASACFAPRLTGKLSFS</p> <p>1 LLELEYLNFIDLSVNEFERSIIPRF</p> <p>2 ICSFKRLLEYLNLSSSFFSGLIPTQ</p> <p>3 FKNLTSRLRLDLGYNLIVKDLTW</p> <p>4 LSHLSSLELLSLGQSDPQVKWVFE</p> <p>5 ITRKPLLEKELDLSLCLSKLVFSPAEIA</p> <p>6 NSSLISLVLHLCNEFSSSAKYSWL</p> <p>7 FNFSTSLTSDLSNNQLDGGIDDR</p> <p>8 FGNLMYLEHLNLANENLKGIPSS</p> <p>9 FGNLTRLRVLDMSNTRTYQWLPFLFVRL</p> <p>10 SGRKTLVLEGLDNDNMFGLVD</p> <p>11 VTRFSALKRRLYLQNNVINGFFMER</p> <p>12 FQGVSSLEVLDSLNDQMRGPLEP</p> <p>13 LALFPSRLRLHLSNHFNGRIPQG</p> <p>14 IGLQLQLILDVSNRLEGLPES</p> <p>15 MGQLSNLESFDASYNVVKGTITESH</p> <p>16 LSNLSSLVLDLDFNSLAKTSD</p> <p>17 WLPFFLQVFNLPSCNLGSPFPKW</p> <p>18 LQSQNNYTVLDISLANISDALPSWF</p> <p>19 SGLPDLKILNLSNNQISGRVSDL</p> <p>20 IENAYDYMYVLDLSSNFFSGPLP</p> <p>21 LVPTNVQIFYLHKNQFSGISSIC</p> <p>22 KSTTGATSLDLSHNQFSGLEPDC</p> <p>23 WMNANLAVLNAYNFFSGKLPQS</p> <p>24 LGSLESLALYLRQNSFSGMLPS</p> <p>25 LSCQCSLQILDGKNLGRIPAWI</p> <p>26 GTDLLNLRILSLRFNKFYGSISPI</p> <p>27 ICQLQFLQILDLSANGLAGKIPQC</p> <p>ID FNNFTLLHQENGLGEMPEFLVQGFY</p> <p>ID GKYPRIYSYLGNNLVQWKVQEAEBY</p> <p>28 KNPLLYLKAIDLSSNKLVGGLPKE</p> <p>29 IAEMLRGLKSLNLSRNDLNGSIIEG</p> <p>30 ICGMKLESLDLSRNQLSGMIPKD</p> <p>31 LANLTFIGVLDLSSNHLGSRIPSS</p> <p>JM TQLQTFERSYSYSGNAQLCGPPLQECPCG</p> <p>JM YAPPSPRIDHNSNMNPQLDVEDDDFFPSLE</p> <p>TM FYISMVLEFFVAFWGLGSLIVN</p> <p>CT HSWRNAYFIFLMDTKNWLAMISRVCCSRLKRLRA</p> | <p><b>RXEG1</b></p> <p>SP MDKRYPRLDHFLVTVWSSLLQLTALG</p> <p>NT LFSREVNKTCIQKERDALLEFRRLSD</p> <p>NT DFDRLSTWGDDEEDKKECKKRWGIECDKRSQH</p> <p>NT VIVLIDLHTEVSCFVRSFCFAPMLTGKLSFS</p> <p>1 LLELHHLNVLNLSHNGFDKIEIPRF</p> <p>2 ISSLKRLEYLNLSSSDFSGVITPQ</p> <p>3 LKNLTSRLRLDLGYNLIVKDLTW</p> <p>4 LSYLSSLEIRLGLGHDFAQSNVFE</p> <p>5 ITRKPLLEKELDLSVCGLSKLVFSPADLV</p> <p>6 KSSLISLVLHLCNQFTSSAAYSWL</p> <p>7 FNFSTSLTSDLSNNQLDGGIDDR</p> <p>8 FGLMYLEHLKLDQFNKLVGVFSS</p> <p>9 FGNLTRLRVLDISSTRTYQWLPFLFRL</p> <p>10 SGRKTLVLEGLDNDNMFGLV</p> <p>11 VTRFSALKRRLYLQNNVINGFFMER</p> <p>12 FQGVSSLEVLDSLNDQMRGPLEP</p> <p>13 LALFPSMRRLHLSNHFNGRIPQG</p> <p>14 IGLQLQLILDVSNRLEGLPES</p> <p>15 MGQLSNLESFDASYNVVKGTITESH</p> <p>16 LSNLSSLVLDLDFNSLAKTSD</p> <p>17 WLPFFLQVFNLPSCNLGSPFPKW</p> <p>18 LQSQNNYTVLDISLANISDALPSWF</p> <p>19 SGLPDLKILNLSNNQISGRVSEF</p> <p>20 IVNKQDYMYVLDLSSNFFSGPLP</p> <p>21 LVPTNVQIFYLHKNQFSGISSIC</p> <p>22 KSTTGATSLDLSHNQFSGLEPDC</p> <p>23 WMNANLAVLNAYNFFSGKLPQS</p> <p>24 LGSLESLALYLRQNSFSGMLPS</p> <p>25 LSCQCSLQILDGKNLGRIPAWI</p> <p>26 GTDLLNLRILSLRFNKFYGSISPI</p> <p>27 ICQLQFLQILDLSANGLAGKIPQC</p> <p>ID FNNFTLLHQENGLGEMPEFLVQGLD</p> <p>ID YLPRYSYLYGNLVQWKVQEAEBY</p> <p>28 KNPLLYLKAIDLSSNKLVGGLPKE</p> <p>29 IAEMLRGLKSLNLSRNDLNGSIIEG</p> <p>30 ICGMKLESLDLSRNQLSGMIPKD</p> <p>31 LANLTFIGVLDLSSNHLGSRIPSS</p> <p>JM TQLQTFERSYSYSGNAQLCGPPLQECPCG</p> <p>JM YAPPSPRIDHNSNMNPQLDVEDDDFFPSLE</p> <p>TM FYISMVLEFFVAFWGLGSLIVN</p> <p>CT RAWRNAYFIFLMDTKNWLAMISRVCFTRLKGKLRAS</p> | <p><b>RXEG2</b></p> <p>NT MRGPLEDLALFPSLRLEHLGFPQWRI</p> <p>NT PQEFWVSSNRLGGLPES</p> <p>1 MGQLSNLESIDASYNVVKGTITESH</p> <p>2 LSNLSSLVLDLDFNSLAKTSD</p> <p>3 WLPFFLQVFNLPSCNLGSPFPKW</p> <p>4 LHSQNNCTVLEISLANISDALPSWF</p> <p>5 SGLPDLKILNLSNNQISGRVSEL</p> <p>6 IVNKQDYMYVLDLSSNFFSGPLP</p> <p>7 QVPTNVRIFFLHKNKFSGSTSSIC</p> <p>8 KSTTGATSLDLSHNFFSGLEPDC</p> <p>9 WMNANLAVLNAYNFFSGKLPGLPS</p> <p>10 FSCQCSLQILDGKNLGRIPAWI</p> <p>11 GTDLLNLRILSLRFNKFYGSISPI</p> <p>12 ICQLQFLQILDLSANGLSEQC</p> <p>ID FNNFTLLHQENGLGEMPEFLVQGFY</p> <p>ID DYMPSRYLYGNLVQWKVQEAEBY</p> <p>13 KNPLLYLKAIDLSSNKLVGGLPKE</p> <p>14 IAEMLRGLKSLNLSRNDLNGSIIEG</p> <p>15 ICGMKLESLDLSRNQLSGMIPKD</p> <p>16 LANLTFIGVLDLSSNHLGSRIPSS</p> <p>JM TQLQTFERSYSYSGNAQLCGPPLQECPCG</p> <p>JM YAPPSPRIDHNSNMNPQLDVEDDDFFPSLE</p> <p>TM FYISMVLEFFVAFWGLGSLIVN</p> <p>CT HSWRNAYFIFLMDTKNWLAMISRV</p> |
|----------------------------------------------------------------------------------------------------------------------------------------------------------------------------------------------------------------------------------------------------------------------------------------------------------------------------------------------------------------------------------------------------------------------------------------------------------------------------------------------------------------------------------------------------------------------------------------------------------------------------------------------------------------------------------------------------------------------------------------------------------------------------------------------------------------------------------------------------------------------------------------------------------------------------------------------------------------------------------------------------------------------------------------------------------------------------------------------------------------------------------------------------------------------------------------------------------------------------------------------------------------------------------------------------------------------------------------------------------------------------------------------------------------------------------------------------------------------------------------------------------------------------|---------------------------------------------------------------------------------------------------------------------------------------------------------------------------------------------------------------------------------------------------------------------------------------------------------------------------------------------------------------------------------------------------------------------------------------------------------------------------------------------------------------------------------------------------------------------------------------------------------------------------------------------------------------------------------------------------------------------------------------------------------------------------------------------------------------------------------------------------------------------------------------------------------------------------------------------------------------------------------------------------------------------------------------------------------------------------------------------------------------------------------------------------------------------------------------------------------------------------------------------------------------------------------------------------------------------------------------------------------------------------------------------------------------------------------------------------------------------------------------------------------------------------------|------------------------------------------------------------------------------------------------------------------------------------------------------------------------------------------------------------------------------------------------------------------------------------------------------------------------------------------------------------------------------------------------------------------------------------------------------------------------------------------------------------------------------------------------------------------------------------------------------------------------------------------------------------------------------------------------------------------------------------------------------------------------------------------------------------------------------------------------------------------------------|

**Supplementary Figure 3. The domain compositions of RXEG1, RXEGL1 and RXEGL2.** The LRRs were aligned and determined according to Jehle et al. 2013<sup>3</sup> and Zipfel et al. 2006<sup>4</sup>. SP, signal peptide; NT, N-terminus of the LRR domain; ID, island domain; JM, juxtamembrane domain; TM, transmembrane domain; CT, cytoplasmic tail.



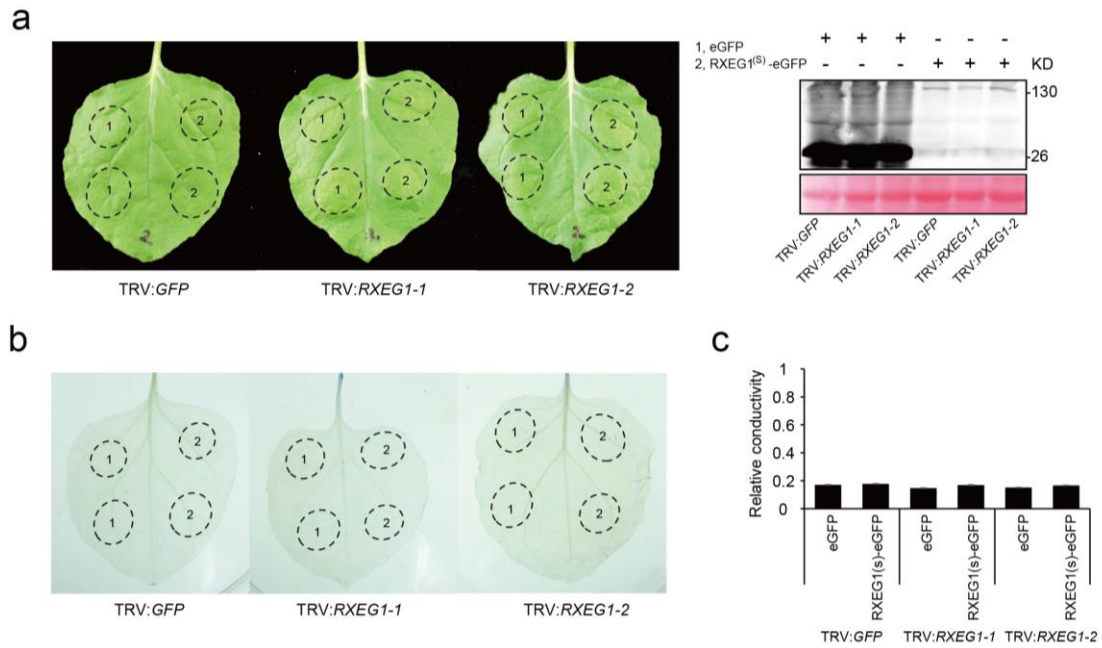

**Supplementary Figure 4. Expression of RXEG1<sup>(S)</sup> in *Nicotiana benthamiana* does not induce plant cell death.**

**a**, *Nicotiana benthamiana* leaves (n=6) expressing RXEG1<sup>(S)</sup>-eGFP or eGFP photographed 3 days after infiltration (dai). RXEG1<sup>(S)</sup>-eGFP or eGFP was co-expressed with P19 in *N. benthamiana* and protein accumulation was monitored 3 dai with anti-GFP antibody.

**b**, Representative *Nicotiana benthamiana* leaves expressing RXEG1<sup>(S)</sup>-eGFP or eGFP stained with trypan blue.

**c**, Relative ion leakage in leaves expressing RXEG1<sup>(S)</sup>-eGFP or eGFP. Leaf discs were collected 3 dai. Bars represent average value ( $\pm$  s.e.m) of six replicates.

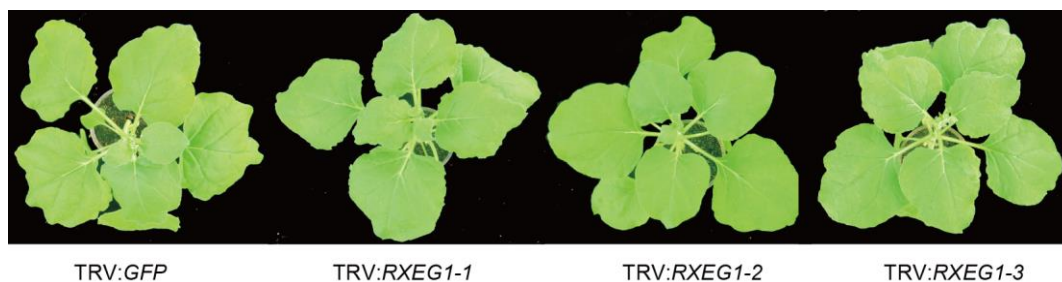

**Supplementary Figure 5. Morphology of *N. benthamiana* plants treated with TRV:GFP or RXEG1-silencing constructs.** Plants were photographed five weeks after silencing.

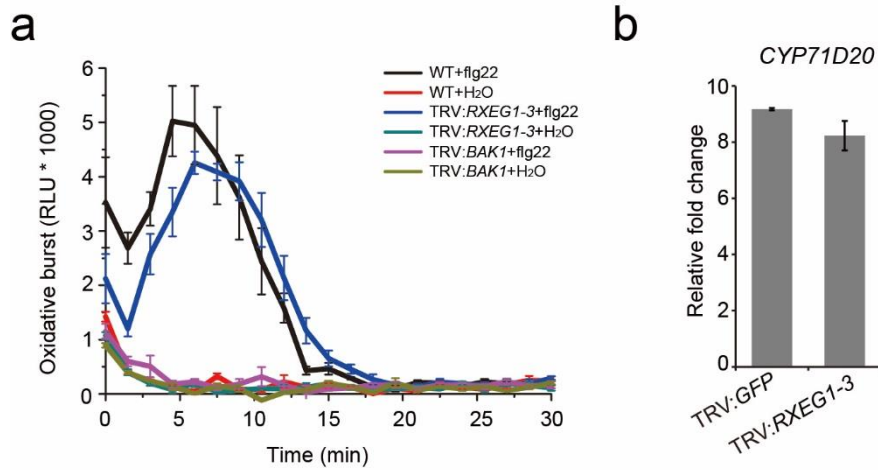

**Supplementary Figure 6. Flg22-induced plant immune responses in TRV:*GFP* and TRV:*RXEG1-3*-treated *N. benthamiana*.**

**a**, Production of ROS in *RXEG1*-silencing *N. benthamiana* treated with 100 nM flg22 or H<sub>2</sub>O. Mean values ( $\pm$  s.e.m) of four replicates are shown. Experiment was repeated three times with similar results.

**b**, Relative expression of defense-related marker gene *CYP71D20* in *RXEG1*-silencing *N. benthamiana* leaves 3 h after treatment with 100 nM flg22 or H<sub>2</sub>O. Transcript levels were quantified by qRT-PCR and normalized to EF-1 $\alpha$ . Bars represent the mean fold changes ( $\pm$  s.e.m) of the flg22-treated leaves relative to the value in H<sub>2</sub>O-treated leaves, which was set as 1. Experiment was repeated twice with similar results.

a

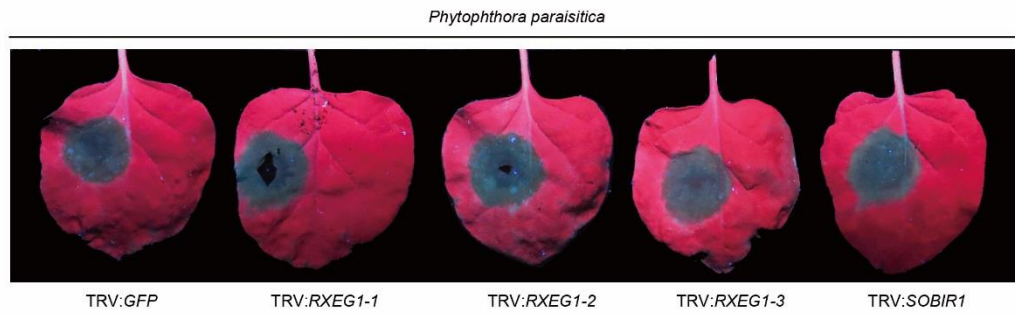

b

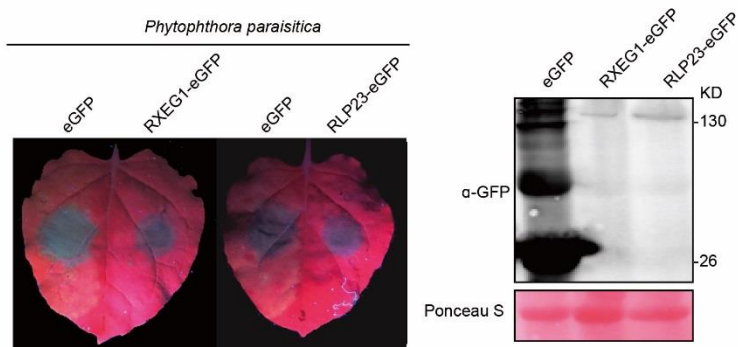

**Supplementary Figure 7. Representative leaves showing the disease symptoms of *SOBIR1*-silencing, *RXEG1*-silencing (a) or overexpressing (b) *N. benthamiana* leaves upon infection with *Phytophthora parasitica*. *N. benthamiana* leaves (silencing, n=12; overexpressing, n=16) were inoculated with *P. parasitica* mycelial plugs and photographed at 3 days post inoculation (dpi). Experiments were repeated twice with similar results. Protein accumulation was monitored 2 dai with anti-GFP antibody. Protein loading is indicated by Ponceau S staining.**

a

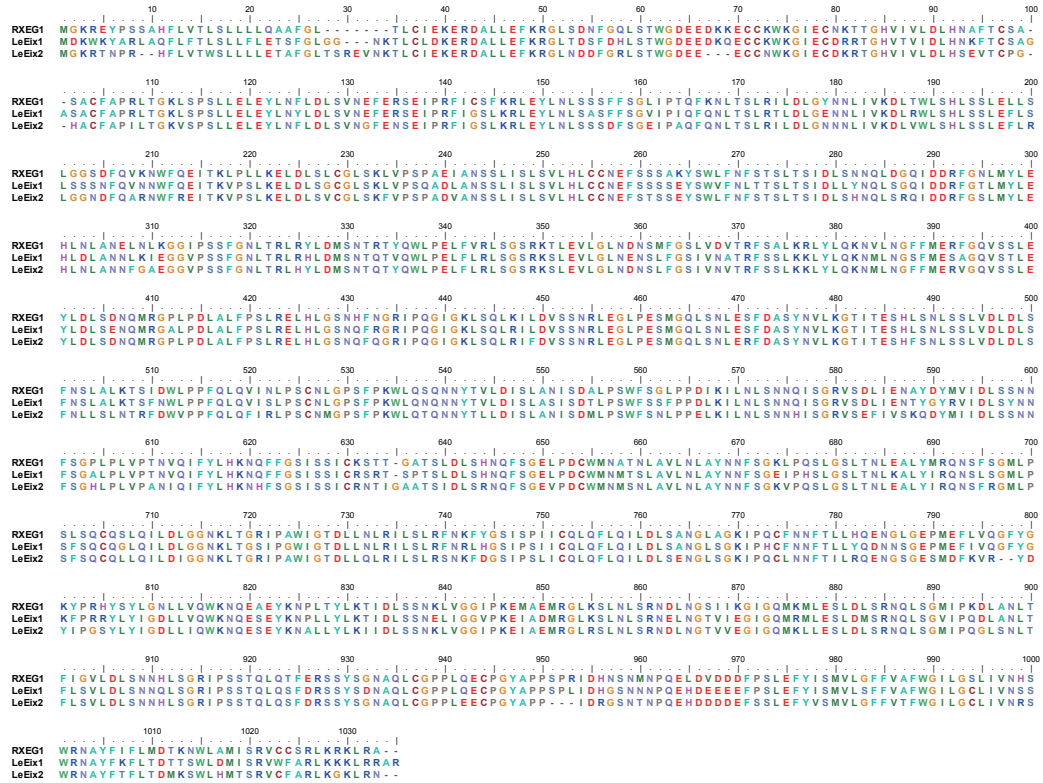

b

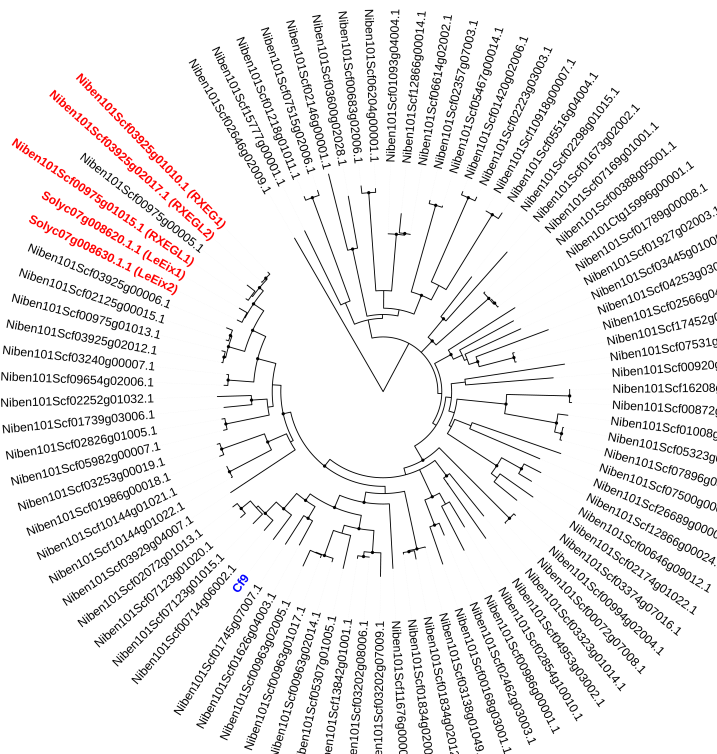

**Supplementary Figure 8. Phylogenetic analysis of RXEG1 with homologs in *N. benthamiana* and tomato.**

**a**, Sequence alignment of RXEG1 with LeEix1 and LeEix2 using ClustalW.

**b**, A phylogenetic tree was built using tomato LeEIX1/2 and all the identified *N. benthamiana* RLPs containing the C3-D domain<sup>5</sup> following the method described by Fritz-Laylin et al. 2005<sup>6</sup> and Petre et al. 2014.<sup>7</sup> The C3-D domain of tomato Cf9<sup>5</sup> was used as the reference.



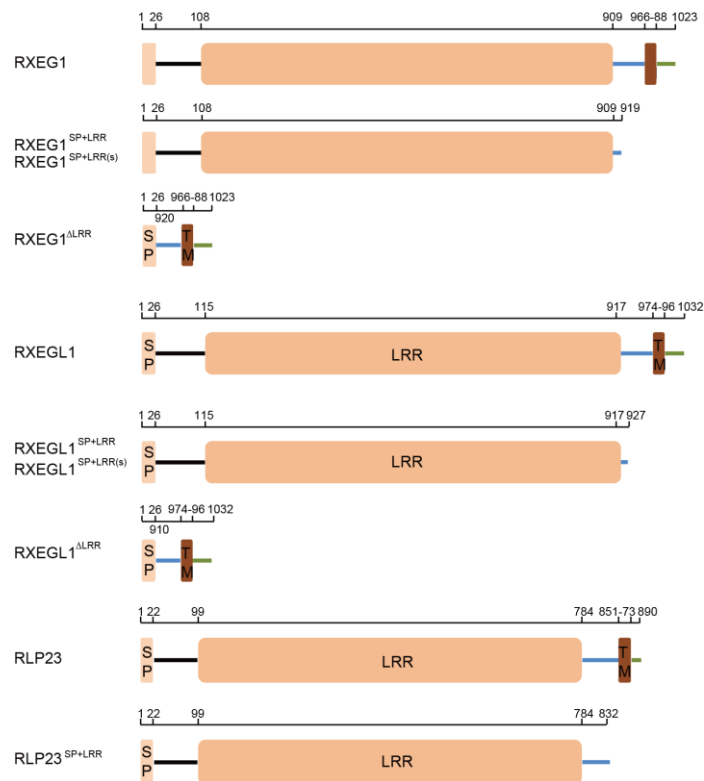

**Supplementary Figure 9. Schematic representation of RXEG1, RXEGL1, *Arabidopsis* RLP23, and derivatives.** Amino acids of each domain are indicated.

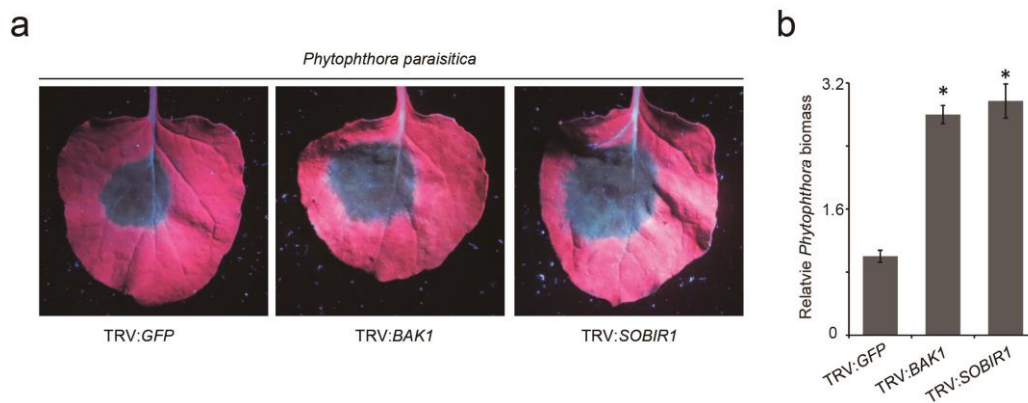

**Supplementary Figure 10. Representative leaves showing the disease symptoms of *BAK1*-silencing and *SOBIR1*-silencing *N. benthamiana* leaves upon infection with *Phytophthora parasitica*.**

**a**, *N. benthamiana* leaves (n=12) were inoculated with *P. parasitica* mycelial plugs and photographed at 3 dpi. Experiments were repeated twice with similar results.

**b**, Relative quantification of *P. parasitica* biomass in TRV:GFP, TRV:BAK1 and TRV:SOBIR1-treated *N. benthamiana* leaves using qPCR. Infected leaves (n=12) were collected at 3 dpi and used for DNA isolation and qPCR analysis. \*, significant differences ( $P < 0.05$ , Student's *t*-test). Experiments were repeated twice with similar results.

**a**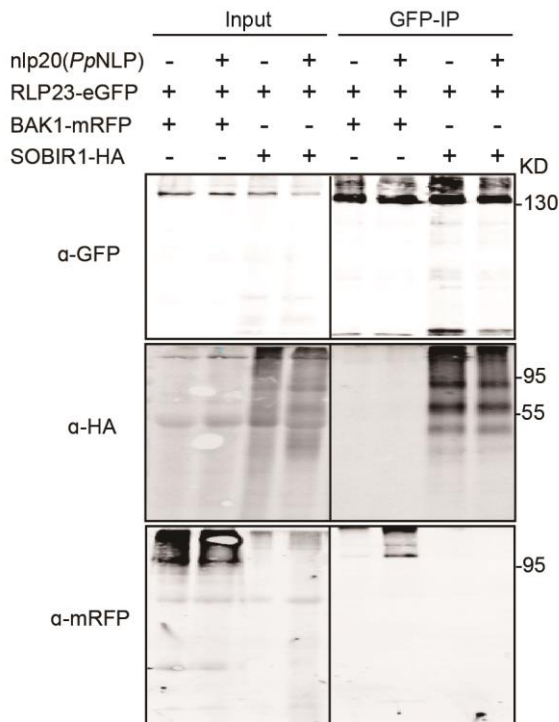**b**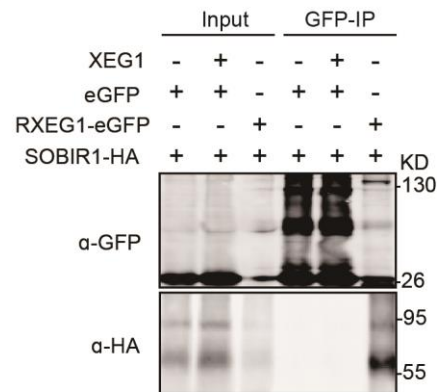

**Supplementary Figure 11. Interactions of RLP23 or RXEG1 with BAK1 or SOBIR1 in *planta*.**

**a**, RLP23 interacts with BAK1 in a nlp20-dependent manner while interacts constitutively with SOBIR1. *N. benthamiana* leaves were agro-infiltrated to express RLP23-eGFP, BAK1-mRFP, or SOBIR1-HA and collected 2 dai after treatment with 1  $\mu$ M nlp20 (*Pp*NLP) or H<sub>2</sub>O for 5 min. Extracted proteins were subjected to Co-IP using GFP-trap® A beads and western blotting with anti-GFP, anti-RFP, and anti-HA antibodies.

**b**, SOBIR1-HA interacts constitutively with RXEG1-eGFP but not with eGFP. SOBIR1-HA was co-expressed with RXEG1-eGFP or eGFP in *N. benthamiana* leaves. Infiltrated leaves were collected at 2 dai and treated with 1  $\mu$ M XEG1 or EV for 10 min before protein isolation. Extracted proteins were subjected to Co-IP using GFP-trap® A beads and western blotting with anti-GFP and anti-HA antibodies.

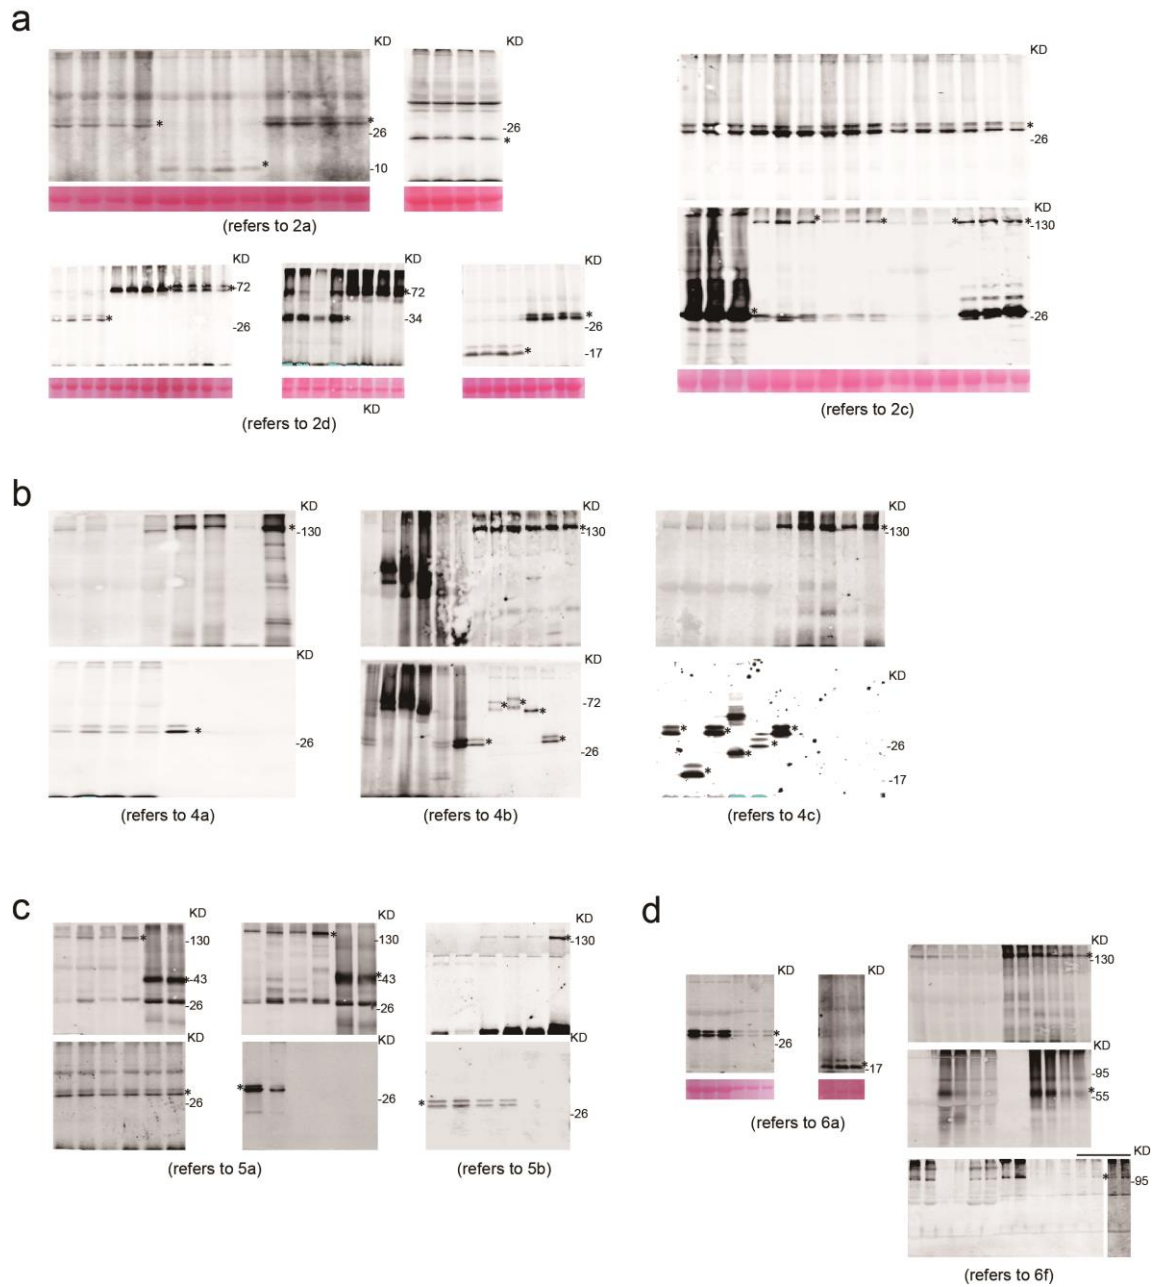

**Supplementary Figure 12. Original western-blot shown in main Figure. \*** pointing to the band with expected sizes. – labeling the same blot visualized in different contrasts.

**Supplementary Table 1. Primer list.**

| Primers                                      | Sequences 5'-3'                                 | Used for                                              |
|----------------------------------------------|-------------------------------------------------|-------------------------------------------------------|
| pBin(c)GFP-RXEG1-F                           | TTACGAACGATAGCCGGTACCATGGGCAAAAGGGAATATCCAAG    | cloning full length RXEG1 in <i>N. benthamiana</i>    |
| pBin(c)GFP-RXEG1-R                           | GCTCACCATCCCAGGGGTACCAGCCCTTAACTTCTCTTCAGTC     |                                                       |
| pBin(c)GFP-RXEG1 <sup>SP+LRR</sup> -R        | GCTCACCATCCCAGGGGTACCAGGATGATCTCTCAAAGTTTGG     | cloning RXEG1 <sup>SP+LRR</sup> domain                |
| pBin(c)GFP-RXEG1 <sup>SP+LRR(s)</sup> -R     | GCTCACCATCCCAGGGGTACCCGATGACCTCTCAAATGTCTGG     | cloning synthesized RXEG1 <sup>SP+LRR</sup> domain    |
| pBin(c)GFP-RXEG1 <sup>SP+TM</sup> -R(F)      | GCTTGATGGAATTCTCCCTGATCCAAAAGCTGCTTGATAGGAG     | cloning RXEG1- $\Delta$ LRR domain                    |
| pBin(c)GFP-RXEG1 <sup>SP+TM</sup> -tail-F(R) | CTCCTACAAGCAGCTTTTGGATCAGGGAGAATTCCATCAAGC      | cloning RXEG1- $\Delta$ LRR domain                    |
| pBin(c)GFP-RXEGL1-F                          | TTACGAACGATAGCCGGTACCATGGATAAAAGGAAATATCCAAG    | cloning full length RXEGL1 in <i>N. benthamiana</i>   |
| pBin(c)GFP-RXEGL1-R                          | GCTCACCATCCCAGGGGTACCTGAGGCCCTTAGCTTTCCCT       |                                                       |
| pBin(c)GFP-RXEGL1 <sup>SP+LRR</sup> -R       | GCTCACCATCCCAGGGGTACCAGGATGATGTCTCAAAGTTTGGAG   | cloning RXEGL1-SP+LRR domain                          |
| pBin(c)GFP-RXEGL1 <sup>SP+LRR(s)</sup> -R    | GCTCACCATCCCAGGGGTACCCGAAGATGTTTCAAATGTTTGC     | cloning synthesized RXEGL1-SP+LRR domain              |
| pBin(c)GFP-RXEGL1 <sup>SP+TM</sup> -R(F)     | GCTTGATGGAATTCTCCCTGATCCTAAAGCTGTCTGTAAGAGC     | cloning RXEGL1- $\Delta$ LRR domain                   |
| pBin(c)GFP-RXEGL1 <sup>TM</sup> -tail-F(R)   | GCTCTTACAGACAGCTTTAGGATCAGGGAGAATTCCATCAAGC     | cloning RXEGL1- $\Delta$ LRR domain                   |
| pBin(c)HA-SOBIR1-F                           | TTACGAACGATAGCCGGTACCATGGCCTTCACTGCTTCAC        | cloning full length SOBIR1 in <i>N. benthamiana</i>   |
| pBin(c)HA-SOBIR1-R                           | AACATCGTATGGGTACCCGGGATGCTTGATCTGAGTTAACATACACC |                                                       |
| pBin(c)mRFP-BAK1-F                           | TTACGAACGATAGCCGGTACCATGGATCAATGGCTATTGGGGATC   | cloning full length BAK1 in <i>N. benthamiana</i>     |
| pBin(c)mRFP-BAK1-R                           | AACATCGTATGGGTACCCGGGTCTTGGCCCTGATAACTCATC      |                                                       |
| pBin(c)GFP-RXEGL2-F                          | TTACGAACGATAGCCGGTACCATGAGAGGGCCATTACCAG        | cloning full length RXEGL2                            |
| pBin(c)GFP-RXEGL2-R                          | GCTCACCATCCCAGGGGTACCGACTCTTGATATCATAGCGAGC     |                                                       |
| pBin(c)GFP-AtRLP23-F                         | TTACGAACGATAGCCGGTACCATGTCAAAGGCGCTTTTGCAT      | cloning full length AtRLP23                           |
| pBin(c)eGFP-AtRLP23-R                        | GCTCACCATCCCAGGGGTACCACGCTTTCTGCGTTTATTCAG      |                                                       |
| pBin(c)GFP-RLP23 <sup>SP+LRR</sup> -R        | GCTCACCATCCCAGGGGTACCGTCTTCTTGCTTTTGGTGATAC     | cloning AtRLP23-SP+LRR domain                         |
| pGR107-PsXEG1-F                              | CCATCGATATGAAGGGATTCTTCGCCG                     | cloning full length XEG1 in <i>Phytophthora sojae</i> |

|                      |                                              |                                                                          |
|----------------------|----------------------------------------------|--------------------------------------------------------------------------|
| pGR107-PsXEG1-R      | TCCCCCGGGGTTGACCGCAGCCGAGAAC                 |                                                                          |
| pGR107-ps119627-F    | GCACCAGCTAGCATCATGAAGGTTGCGTTCGCTACTG        | cloning full length XEG1 homologue Ps119627 in <i>Phytophthora sojae</i> |
| pGR107-ps119627-R    | CTCTAGAGGATCCCCGACGCGACGAACACTGCGG           |                                                                          |
| pGR107-ps138787-F    | GCACCAGCTAGCATCATGAAGGTTCTGTTCCGCCAC         | cloning full length XEG1 homologue Ps138787 in <i>Phytophthora sojae</i> |
| pGR107-ps138787-R    | CTCTAGAGGATCCCCCTCGCGACGAACGCGACGGA          |                                                                          |
| pGR107-PPTG_16272-F  | CCATCGATATGAAGCTTTCCTTCGC                    | cloning full length PPTG_16272 in <i>Phytophthora parasitica</i>         |
| pGR107-PPTG_16272-R  | TCCCCCGGGAAGTGTGTGGACAGCGGCC                 |                                                                          |
| pGR107-PITG_06962-F  | TCAGCACCAGCTAGCATCGATATGAAGGTTCTTCGCTGCTG    | cloning full length PITG_06962 in <i>Phytophthora infestans</i>          |
| pGR107-PITG_06962-R  | AATCTCTAGAGGATCCCCGGGTCGTCCCCTGAAGAAGTCGG    |                                                                          |
| pGR107-VDAG_07406-F  | TCAGCACCAGCTAGCATCGATATGAAGTTCATCACAGTCCTTAC | cloning full length VDAG_07406 in <i>Verticillium dalia</i>              |
| pGR107-VDAG_07406-R  | AATCTCTAGAGGATCCCCGGGACTGCACTGGGAGTACCACTG   |                                                                          |
| pGR107-NPP1-F        | CCATCGATATGAACGTCCTTACATTCCCTC               | cloning full length NPP1 in <i>Phytophthora parasitica</i>               |
| pGR107-NPP1-R        | TCCCCCGGGAGCGTAGTAAGCGTTGCCT                 |                                                                          |
| NbCYP71D20-RT-F      | CCGCACCATGTCCTTAGAG                          | Antje Heese et al., 2007                                                 |
| NbCYP71D20-RT-R      | CTTGCCCTTGAGTACTTGC                          |                                                                          |
| NbEF1 $\alpha$ -RT-F | GTATGCCTGGGTGCTTGAC                          | Antje Heese et al., 2007                                                 |
| NbEF1 $\alpha$ -RT-R | ACAGGGACAGTTCCAATACCA                        |                                                                          |
| NbSOBIR1-RT-F        | CTTAGAAAACTCTCTTTAGC                         | Liebrand et al., 2012                                                    |
| NbSOBIR1-RT-R        | TATGGATTGGAGTGACATTATG                       |                                                                          |
| NbSERK3-RT-F         | ATTGCTGGAGGAGTTGCTGCCGG                      | RT check expression of BAK1 homologues                                   |
| NbSERK3-RT-R         | CCACGTACAGCAGTGGTAACAT                       |                                                                          |
| PAR-F                | ATGAACTCCGCGCTCTGTT                          | <i>Phytophthora parasitica</i> biomass analysis                          |
| PAR-R                | CAGTGACGCGCACGTAGAC                          |                                                                          |



## References

1. Fischer, I., Dievart, A., Droc, G., Dufayard, J.-F. & Chantret, N. Evolutionary dynamics of the leucine-rich repeat receptor-like kinase (LRR-RLK) subfamily in Angiosperms. *Plant Physiology* **170**, 1595-1610 (2016).
2. Shiu, S.H. et al. Comparative analysis of the receptor-like kinase family in Arabidopsis and rice. *Plant Cell* **16**, 1220-1234 (2004).
3. Jehle, A.K. et al. The receptor-Like protein ReMAX of Arabidopsis detects the microbe-associated molecular pattern eMax from *Xanthomonas*. *Plant Cell* **25**, 2330-2340 (2013).
4. Zipfel, C. et al. Perception of the bacterial PAMP EF-Tu by the receptor EFR restricts *Agrobacterium*-mediated transformation. *Cell* **125**, 749-760 (2006).
5. Jones, D.A. & Jones, J.D.G. The role of leucine-rich repeat proteins in plant defences. *Advances in Botanical Research Incorporating Advances in Plant Pathology*, **24**, (eds. Andrews, J.H. & Tommerup, I.C.) 89-167 (1997).
6. Fritz-Laylin, L.K., Krishnamurthy, N., Tor, M., Sjolander, K.V. & Jones, J.D.G. Phylogenomic analysis of the receptor-like proteins of rice and Arabidopsis. *Plant Physiology* **138**, 611-623 (2005).
7. Petre, B., Hacquard, S., Duplessis, S. & Rouhier, N. Genome analysis of poplar LRR-RLP gene clusters reveals RISP, a defense-related gene coding a candidate endogenous peptide elicitor. *Frontiers in Plant Science* **5**, 111 (2014).
